# Supplementary material
Source: MDPI journal article supplement (https://www.mdpi.com/2304-6740/11/5/201)
Supplement: s1 [file s1]

| Model species                                                                                   | DLPNO-CCSDT/cc-pvdz |
|-------------------------------------------------------------------------------------------------|---------------------|
| $[\text{B}_{10}\text{H}_8\text{O}_2\text{CCH}_3(\text{H}^{\text{fac}})] + \text{CH}_3\text{CN}$ | 0.0                 |
| <b>Formation of Tris_B<sub>1</sub></b>                                                          |                     |
| $\text{TS}_{\text{migr\_B}_1} + \text{CH}_3\text{CN}$                                           | 61.0                |
| $\text{H}_2\_ \text{B}_1 + \text{CH}_3\text{CN}$                                                | 45.1                |
| $\text{TS}_{\text{elim\_B}_1}$                                                                  | 163.5               |
| $\text{Tris\_B}_1 + \text{H}_2$                                                                 | -86.7               |
| <b>Formation of Tris_B<sub>3</sub></b>                                                          |                     |
| $\text{TS}_{\text{migr\_B}_3} + \text{CH}_3\text{CN}$                                           | 50.9                |
| $\text{H}_2\_ \text{B}_3 + \text{CH}_3\text{CN}$                                                | 37.0                |
| $\text{TS}_{\text{elim\_B}_3}$                                                                  | 124.4               |
| $\text{Tris\_B}_3 + \text{H}_2$                                                                 | -89.9               |
| <b>Formation of Tris_B<sub>4</sub></b>                                                          |                     |
| $\text{TS}_{\text{migr\_B}_4} + \text{CH}_3\text{CN}$                                           | 47.6                |
| $\text{H}_2\_ \text{B}_4 + \text{CH}_3\text{CN}$                                                | 29.7                |
| $\text{TS}_{\text{elim\_B}_4}$                                                                  | 120.2               |
| $\text{Tris\_B}_4 + \text{H}_2$                                                                 | -95.9               |
|                                                                                                 |                     |
| $[\text{B}_{10}\text{H}_{11}]^- + \text{CH}_3\text{CN}$                                         | 0.0                 |
| <b>Formation of <math>[\text{1-B}_{10}\text{H}_9\text{NCCH}_3]^-</math></b>                     |                     |
| $\text{B}_{10\_}\text{TS}_{\text{migr\_ap}} + \text{CH}_3\text{CN}$                             | 67.7                |
| $\text{B}_{10\_}\text{H}_2\_ \text{ap} + \text{CH}_3\text{CN}$                                  | 52.9                |
| $\text{B}_{10\_}\text{TS}_{\text{elim\_ap}}$                                                    | 174.9               |
| $[\text{1-B}_{10}\text{H}_9\text{NCCH}_3]^- + \text{H}_2$                                       | -62.2               |
| <b>Formation of <math>[\text{2-B}_{10}\text{H}_9\text{NCCH}_3]^-</math></b>                     |                     |
| $\text{B}_{10\_}\text{TS}_{\text{migr\_eq}} + \text{CH}_3\text{CN}$                             | 78.8                |
| $\text{B}_{10\_}\text{H}_2\_ \text{eq} + \text{CH}_3\text{CN}$                                  | 41.8                |
| $\text{B}_{10\_}\text{TS}_{\text{elim\_eq}}$                                                    | 119.6               |
| $[\text{2-B}_{10}\text{H}_9\text{NCCH}_3]^- + \text{H}_2$                                       | -64.2               |

**Table S1.** Relative electronic energies (DLPNO-CCSDT/cc-pvdz level of theory) of main molecular species in kJ/mol.

| Model species                      | $\rho(r)$<br>(e Å <sup>-3</sup> ) | $\nabla^2\rho(r)$<br>(e Å <sup>-5</sup> ) | H <sub>b</sub><br>(h e <sup>-1</sup> ) | δ     |
|------------------------------------|-----------------------------------|-------------------------------------------|----------------------------------------|-------|
| <b>B<sub>1</sub>-H<sub>2</sub></b> |                                   |                                           |                                        |       |
| B-H <sub>2</sub>                   | 0.132                             | 0.353                                     | -0.104                                 | 0.359 |
| H-H                                | 0.217                             | -0.721                                    | -0.200                                 | 0.633 |
| <b>B<sub>3</sub>-H<sub>2</sub></b> |                                   |                                           |                                        |       |
| B-H <sub>2</sub>                   | 0.128                             | 0.314                                     | -0.100                                 | 0.332 |
| H-H                                | 0.220                             | -0.746                                    | -0.205                                 | 0.637 |
| <b>B<sub>4</sub>-H<sub>2</sub></b> |                                   |                                           |                                        |       |
| B-H <sub>2</sub>                   | 0.126                             | 0.329                                     | -0.098                                 | 0.330 |
| H-H                                | 0.222                             | -0.762                                    | -0.209                                 | 0.641 |

**Table S2.** Main topological parameters of electron density for interactions in B-H<sub>2</sub> fragments.  $\rho(r)$  – electron density at the bcp,  $\nabla^2\rho(r)$  – Laplacian of electron density at the bcp,  $H_b$  – total energy at the bcp,  $\delta$  – delocalization index.

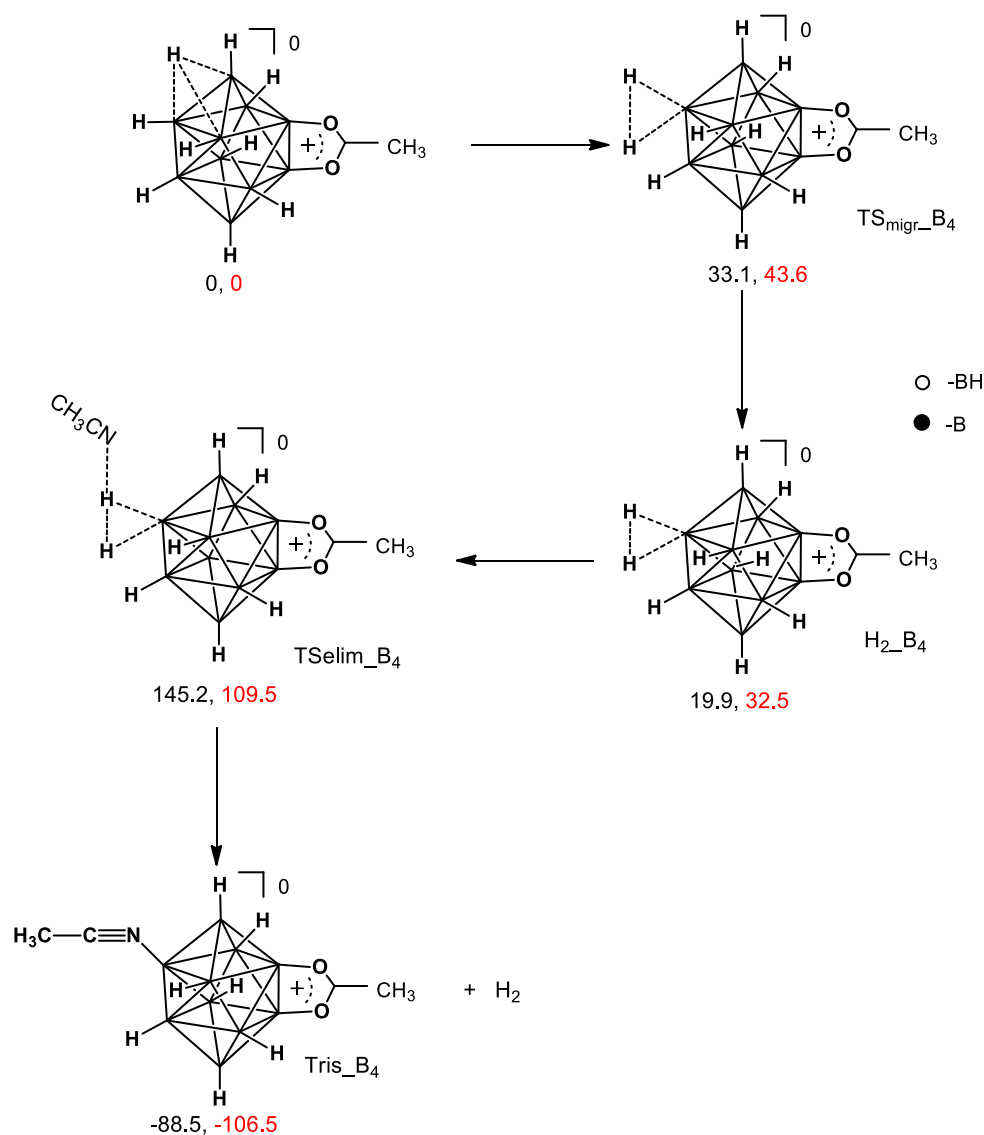

**Figure S1.** Expanded general scheme for the formation of trisubstituted derivative Tris\_B<sub>4</sub>. Relative Gibbs energy (wB97X-D3 level of theory; kJ/mol) is marked in black and relative electronic energy (DLPNO-CCSDT level of theory + ZPE corrections; kJ/mol) is marked in red. All hydrogen atoms are shown in an explicit form on the scheme.

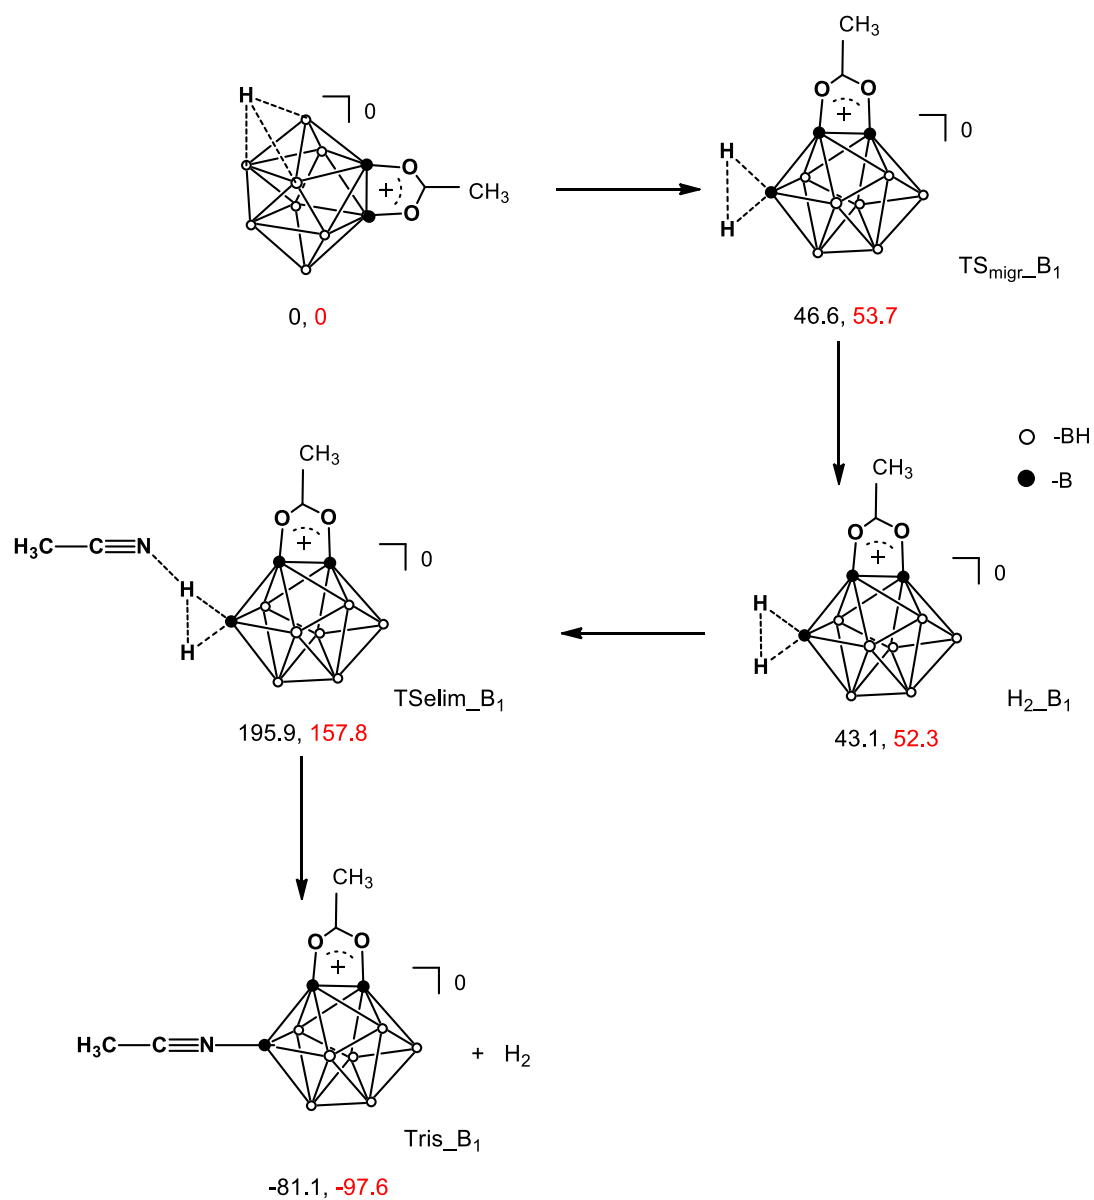

**Figure S2.** General scheme for the formation of trisubstituted derivative  $\text{Tris\_B}_1$ . Relative Gibbs energy (wB97X-D3 level; kJ/mol) is marked in black and relative electronic energy (DLPNO-CCSDT level + ZPE corrections; kJ/mol) is marked in red.

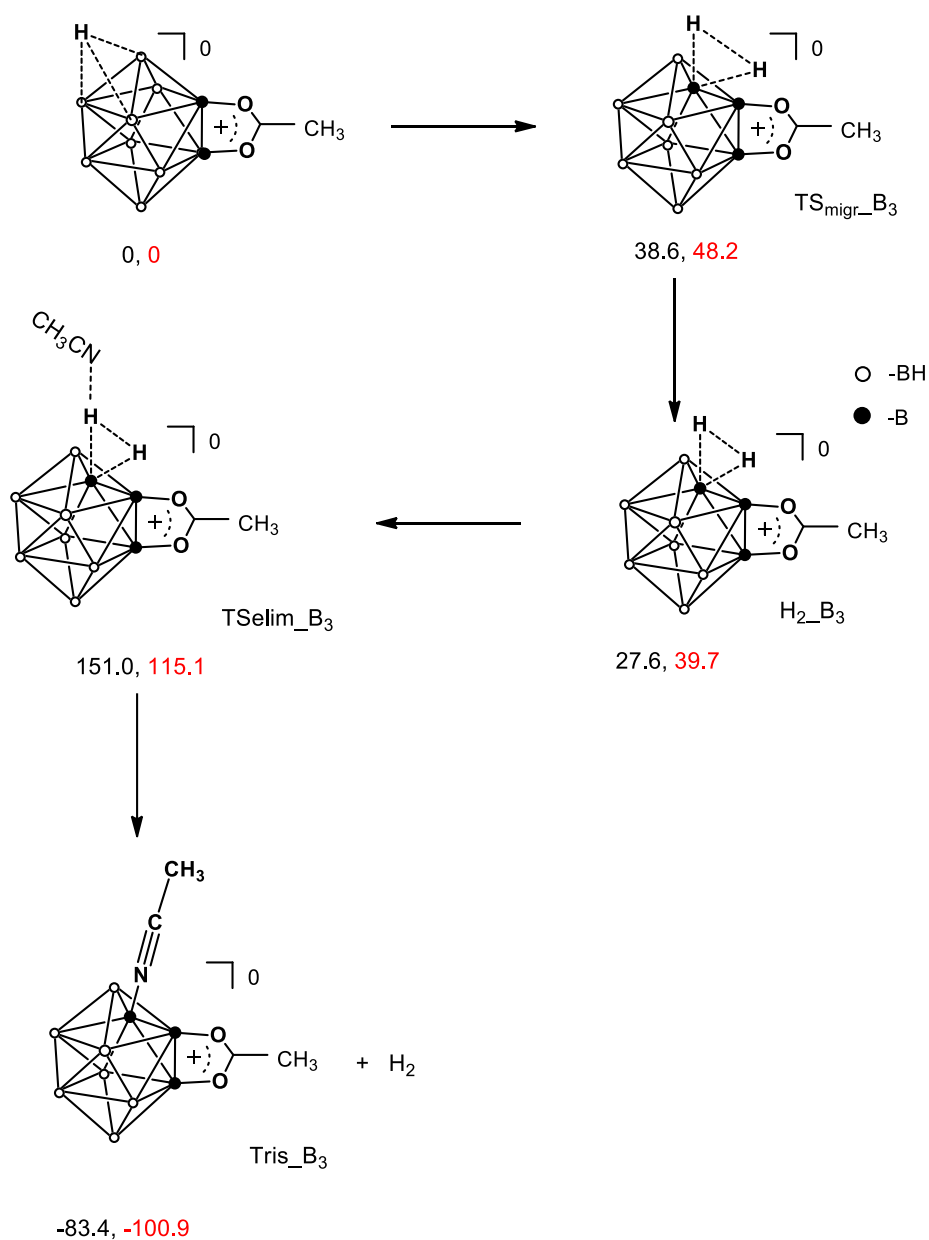

**Figure S3.** General scheme for the formation of trisubstituted derivative  $\text{Tris\_B}_3$ . Relative Gibbs energy (wB97X-D3 level; kJ/mol) is marked in black and relative electronic energy (DLPNO-CCSDT level + ZPE corrections; kJ/mol) is marked in red.

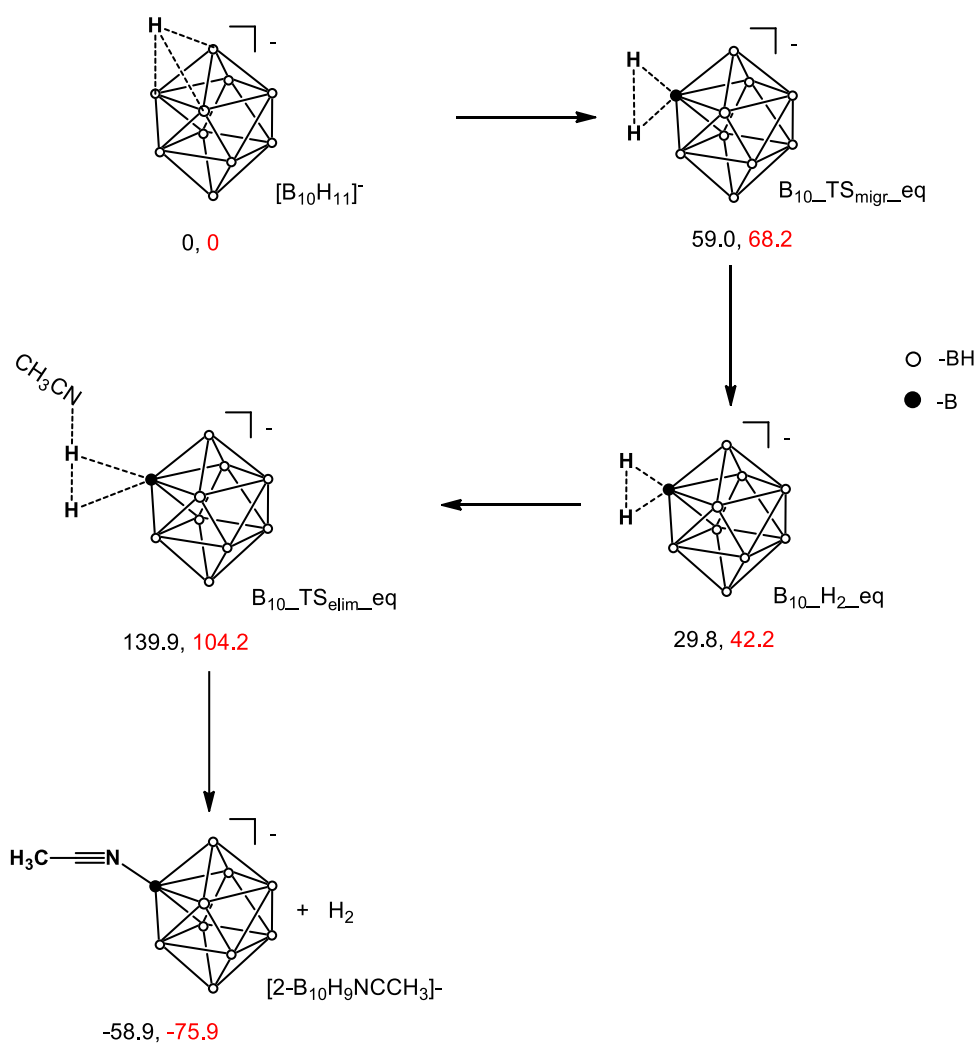

**Figure S4.** General scheme for the formation of  $[2-B_{10}H_9NCCH_3]^-$ . Relative Gibbs energy (wB97X-D3 level of theory; kJ/mol) is marked in black and relative electronic energy (DLPNO-CCSDT level of theory + ZPE corrections; kJ/mol) is marked in red.

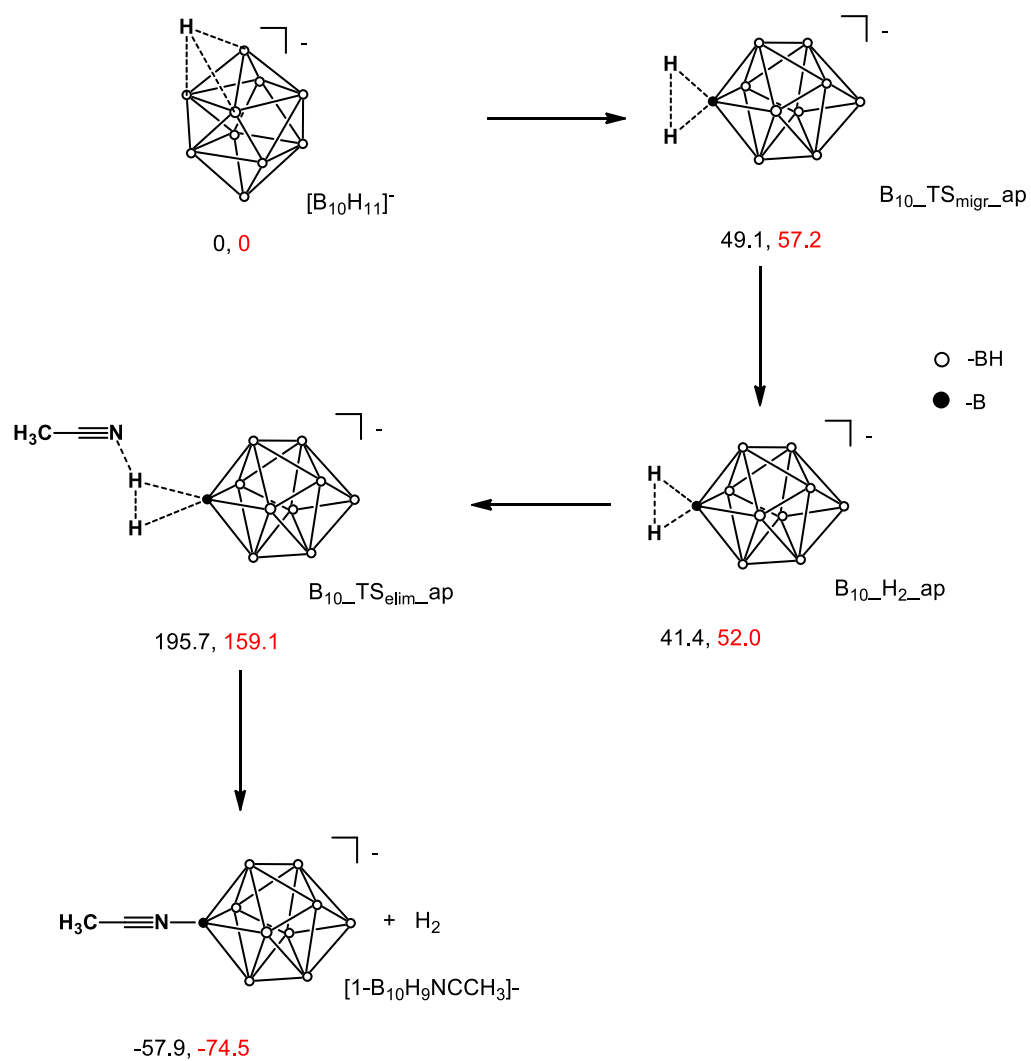

**Figure S5.** General scheme for the formation of  $[1-B_{10}H_9NCCH_3]^-$ . Relative Gibbs energy (wB97X-D3 level of theory; kJ/mol) is marked in black and relative electronic energy (DLPNO-CCSDT level of theory + ZPE corrections; kJ/mol) is marked in red.

| Model species                                                                                            | Atom | x        | y         | z         |
|----------------------------------------------------------------------------------------------------------|------|----------|-----------|-----------|
| <b>[B<sub>10</sub>H<sub>8</sub>O<sub>2</sub>CCH<sub>3</sub>(H<sup>f<sub>ac</sub>)</sup>]<sup>0</sup></b> |      |          |           |           |
| ΔG                                                                                                       | O    | 7.262623 | 6.722111  | 11.198505 |
| -482.46148622                                                                                            | O    | 6.553767 | 5.125584  | 9.844496  |
| Electronic energy                                                                                        | C    | 7.309035 | 5.504208  | 10.804796 |
| -481.103131538571                                                                                        | C    | 8.232902 | 4.549637  | 11.434990 |
| Electronic energy+ZPE                                                                                    | H    | 7.685947 | 3.648724  | 11.709650 |
| -480.918349828571                                                                                        | H    | 8.712885 | 4.991293  | 12.301937 |
|                                                                                                          | H    | 8.984759 | 4.272232  | 10.693848 |
|                                                                                                          | B    | 5.568584 | 6.829003  | 7.713112  |
|                                                                                                          | H    | 5.766450 | 6.377785  | 6.635151  |
|                                                                                                          | B    | 5.772746 | 6.269678  | 9.285359  |
|                                                                                                          | B    | 4.171334 | 6.815492  | 8.674765  |
|                                                                                                          | H    | 3.168743 | 6.295097  | 8.302959  |
|                                                                                                          | B    | 4.993088 | 8.378871  | 8.155920  |
|                                                                                                          | H    | 4.742628 | 9.142351  | 7.276917  |
|                                                                                                          | B    | 6.606671 | 7.719226  | 8.699578  |
|                                                                                                          | H    | 7.735809 | 7.944448  | 8.398822  |
|                                                                                                          | B    | 6.249054 | 7.491439  | 10.427749 |
|                                                                                                          | B    | 4.524376 | 6.905347  | 10.426617 |
|                                                                                                          | H    | 4.036437 | 6.152054  | 11.206706 |
|                                                                                                          | B    | 3.948052 | 8.345098  | 9.623757  |
|                                                                                                          | H    | 2.933328 | 8.958987  | 9.638799  |
|                                                                                                          | B    | 5.858145 | 9.054748  | 9.665576  |
|                                                                                                          | H    | 6.339998 | 10.135649 | 9.569779  |
|                                                                                                          | B    | 5.000663 | 8.401195  | 11.107467 |
|                                                                                                          | H    | 4.847665 | 8.714699  | 12.237722 |
|                                                                                                          | H    | 4.790613 | 9.509129  | 10.477487 |

|                                        |   |          |           |           |
|----------------------------------------|---|----------|-----------|-----------|
| <b>TS<sub>migr</sub>_B<sub>1</sub></b> |   |          |           |           |
| $\Delta G$                             | O | 7.285140 | 6.724169  | 11.193005 |
| -482.44374631                          | O | 6.512019 | 5.122878  | 9.881325  |
| Electronic energy                      | C | 7.300888 | 5.499849  | 10.811169 |
| -481.079882204925                      | C | 8.244162 | 4.549683  | 11.419332 |
| Electronic energy+ZPE                  | H | 7.845379 | 3.540421  | 11.372229 |
| -480.897899574925                      | H | 8.469905 | 4.841592  | 12.440858 |
|                                        | H | 9.165732 | 4.588761  | 10.832721 |
|                                        | B | 5.545498 | 6.795846  | 7.740142  |
|                                        | H | 5.737136 | 6.275815  | 6.691375  |
|                                        | B | 5.739682 | 6.282552  | 9.331265  |
|                                        | B | 4.139112 | 6.859173  | 8.692793  |
|                                        | H | 3.140368 | 6.322565  | 8.330525  |
|                                        | B | 5.006163 | 8.372959  | 8.134911  |
|                                        | H | 4.764590 | 9.121774  | 7.239805  |
|                                        | B | 6.603710 | 7.707740  | 8.690792  |
|                                        | H | 7.740406 | 7.867427  | 8.370344  |
|                                        | B | 6.274326 | 7.506641  | 10.434441 |
|                                        | B | 4.489238 | 6.935142  | 10.463109 |
|                                        | H | 3.984631 | 6.172064  | 11.222844 |
|                                        | B | 4.002264 | 8.402219  | 9.617912  |
|                                        | H | 2.997827 | 9.037041  | 9.652108  |
|                                        | B | 5.824490 | 9.049971  | 9.631323  |
|                                        | H | 6.281099 | 10.145550 | 9.581068  |
|                                        | B | 5.022473 | 8.437272  | 11.015382 |
|                                        | H | 4.863655 | 8.834053  | 12.155311 |
|                                        | H | 4.850002 | 9.621620  | 11.242140 |
| <b>TS<sub>migr</sub>_B<sub>3</sub></b> |   |          |           |           |



|                       |   |          |           |           |
|-----------------------|---|----------|-----------|-----------|
| $\Delta G$            | O | 7.133186 | 6.683334  | 11.442373 |
| -482.44678374         | O | 6.479090 | 5.102115  | 10.044200 |
| Electronic energy     | C | 7.216308 | 5.476894  | 11.016078 |
| -481.083751630950     | C | 8.155073 | 4.542446  | 11.656647 |
| Electronic energy+ZPE | H | 7.855262 | 4.413643  | 12.697429 |
| -480.899996730950     | H | 9.150809 | 4.985090  | 11.648776 |
|                       | H | 8.156905 | 3.586528  | 11.143912 |
|                       | B | 5.504362 | 6.813444  | 7.940972  |
|                       | H | 5.764021 | 6.346219  | 6.881837  |
|                       | B | 5.664302 | 6.244825  | 9.511355  |
|                       | B | 4.058985 | 6.789982  | 8.867534  |
|                       | H | 3.091779 | 6.220015  | 8.472160  |
|                       | B | 4.857181 | 8.334004  | 8.323863  |
|                       | H | 4.623254 | 9.103670  | 7.446939  |
|                       | B | 6.502873 | 7.722051  | 8.964001  |
|                       | H | 7.644354 | 7.936941  | 8.705462  |
|                       | B | 6.081379 | 7.430401  | 10.699098 |
|                       | B | 4.393826 | 6.838234  | 10.639140 |
|                       | H | 3.862652 | 6.070443  | 11.378267 |
|                       | B | 3.849764 | 8.307433  | 9.812100  |
|                       | H | 2.822792 | 8.906884  | 9.821844  |
|                       | B | 5.571296 | 8.952381  | 9.868088  |
|                       | H | 6.054182 | 10.084672 | 9.743683  |
|                       | B | 4.805621 | 8.385380  | 11.270780 |
|                       | H | 4.564465 | 8.846403  | 12.334953 |
|                       | H | 5.481364 | 9.866478  | 10.697474 |
| $TS_{migr\_B4}$       |   |          |           |           |
| $\Delta G$            | O | 7.123149 | 6.708116  | 11.274444 |

|                                    |   |          |           |           |
|------------------------------------|---|----------|-----------|-----------|
| -482.44888864                      | O | 6.539319 | 5.079224  | 9.894909  |
| Electronic energy                  | C | 7.238258 | 5.493895  | 10.880922 |
| -481.084989764549                  | C | 8.195925 | 4.591812  | 11.539921 |
| Electronic energy+ZPE              | H | 7.829914 | 3.569226  | 11.508060 |
| -480.901725424549                  | H | 8.381616 | 4.915017  | 12.559820 |
|                                    | H | 9.131427 | 4.642483  | 10.977226 |
|                                    | B | 5.523848 | 6.731279  | 7.742941  |
|                                    | H | 5.738859 | 6.240895  | 6.684039  |
|                                    | B | 5.711793 | 6.188069  | 9.317155  |
|                                    | B | 4.101859 | 6.674597  | 8.684010  |
|                                    | H | 3.126901 | 6.121951  | 8.288261  |
|                                    | B | 4.979756 | 8.296093  | 8.106504  |
|                                    | H | 4.702352 | 9.045061  | 7.225052  |
|                                    | B | 6.523532 | 7.690881  | 8.748259  |
|                                    | H | 7.672287 | 7.873219  | 8.488238  |
|                                    | B | 6.092350 | 7.425105  | 10.472996 |
|                                    | B | 4.436120 | 6.753696  | 10.436604 |
|                                    | H | 3.887457 | 5.973596  | 11.147511 |
|                                    | B | 3.958690 | 8.254692  | 9.589742  |
|                                    | H | 3.361204 | 8.918312  | 10.451772 |
|                                    | B | 5.658364 | 8.956007  | 9.653583  |
|                                    | B | 4.793418 | 8.341061  | 11.046863 |
|                                    | H | 4.603569 | 8.803641  | 12.120914 |
|                                    | H | 6.030612 | 10.083996 | 9.684061  |
|                                    | H | 2.861229 | 8.787264  | 9.411612  |
| <b>H<sub>2</sub>_B<sub>1</sub></b> |   |          |           |           |
| $\Delta G$                         | O | 7.283555 | 6.749118  | 11.176227 |
| -482.44506627                      | O | 6.505648 | 5.129710  | 9.888358  |

|                                    |   |          |           |           |
|------------------------------------|---|----------|-----------|-----------|
| Electronic energy                  | C | 7.294683 | 5.519101  | 10.811275 |
| -481.085969180365                  | C | 8.236763 | 4.577475  | 11.436188 |
| Electronic energy+ZPE              | H | 7.848405 | 3.564520  | 11.385301 |
| -480.898418620365                  | H | 8.441906 | 4.873524  | 12.461090 |
|                                    | H | 9.168666 | 4.625008  | 10.867028 |
|                                    | B | 5.535700 | 6.765990  | 7.729488  |
|                                    | H | 5.721607 | 6.208878  | 6.697923  |
|                                    | B | 5.731765 | 6.285443  | 9.318726  |
|                                    | B | 4.131463 | 6.878645  | 8.689561  |
|                                    | H | 3.125219 | 6.340450  | 8.347304  |
|                                    | B | 5.022919 | 8.354980  | 8.069104  |
|                                    | H | 4.780639 | 9.084527  | 7.157207  |
|                                    | B | 6.601938 | 7.710517  | 8.653898  |
|                                    | H | 7.742502 | 7.838361  | 8.328504  |
|                                    | B | 6.270734 | 7.521245  | 10.408611 |
|                                    | B | 4.504064 | 6.973835  | 10.454799 |
|                                    | H | 3.978107 | 6.226271  | 11.217851 |
|                                    | B | 4.035014 | 8.461310  | 9.572656  |
|                                    | H | 3.019884 | 9.083268  | 9.589581  |
|                                    | B | 5.820931 | 9.067440  | 9.548591  |
|                                    | H | 6.281754 | 10.163158 | 9.510296  |
|                                    | B | 5.037863 | 8.490756  | 10.921228 |
|                                    | H | 4.898798 | 8.681269  | 12.186227 |
|                                    | H | 4.809367 | 9.439977  | 11.76121  |
| <b>H<sub>2</sub>_B<sub>3</sub></b> |   |          |           |           |
| $\Delta G$                         | O | 7.248962 | 6.667726  | 11.218812 |
| -482.45097085                      | O | 6.556928 | 5.066903  | 9.860619  |
| Electronic energy                  | C | 7.316252 | 5.454951  | 10.810308 |

|                                    |   |          |           |           |
|------------------------------------|---|----------|-----------|-----------|
| -481.089037456508                  | C | 8.271323 | 4.515172  | 11.419749 |
| Electronic energy+ZPE              | H | 7.741494 | 3.610978  | 11.717090 |
| -480.903238296508                  | H | 8.769146 | 4.967652  | 12.270952 |
|                                    | H | 9.005301 | 4.238260  | 10.661243 |
|                                    | B | 5.553427 | 6.732620  | 7.743397  |
|                                    | H | 5.786924 | 6.224402  | 6.696393  |
|                                    | B | 5.738377 | 6.204595  | 9.320117  |
|                                    | B | 4.129350 | 6.758263  | 8.696755  |
|                                    | H | 3.144449 | 6.198356  | 8.329513  |
|                                    | B | 4.954591 | 8.275478  | 8.105122  |
|                                    | H | 4.709927 | 9.048329  | 7.232399  |
|                                    | B | 6.569345 | 7.675580  | 8.721819  |
|                                    | H | 7.711143 | 7.882425  | 8.452184  |
|                                    | B | 6.181213 | 7.409107  | 10.492145 |
|                                    | B | 4.488804 | 6.824200  | 10.466263 |
|                                    | H | 3.957628 | 6.046626  | 11.196875 |
|                                    | B | 3.959172 | 8.308834  | 9.629470  |
|                                    | H | 2.930831 | 8.906800  | 9.627449  |
|                                    | B | 5.659178 | 8.886954  | 9.643607  |
|                                    | H | 6.256134 | 9.998752  | 9.280845  |
|                                    | B | 4.917318 | 8.363769  | 11.061626 |
|                                    | H | 4.719836 | 8.898598  | 12.100280 |
|                                    | H | 5.909725 | 10.094689 | 10.066703 |
| <b>H<sub>2</sub>_B<sub>4</sub></b> |   |          |           |           |
| $\Delta G$                         | O | 7.161960 | 6.663260  | 11.170002 |
| -482.45391083                      | O | 6.540951 | 5.060284  | 9.778365  |
| Electronic energy                  | C | 7.263743 | 5.457583  | 10.755189 |
| -481.091812032097                  | C | 8.214509 | 4.527409  | 11.386985 |

|                                        |   |          |           |           |
|----------------------------------------|---|----------|-----------|-----------|
| Electronic energy+ZPE                  | H | 7.680205 | 3.629040  | 11.694887 |
| -480.905980872097                      | H | 8.703186 | 4.992518  | 12.236648 |
|                                        | H | 8.954787 | 4.236126  | 10.640604 |
|                                        | B | 5.525567 | 6.731306  | 7.661564  |
|                                        | H | 5.757671 | 6.244257  | 6.604161  |
|                                        | B | 5.713280 | 6.183257  | 9.228697  |
|                                        | B | 4.100773 | 6.696035  | 8.597915  |
|                                        | H | 3.111284 | 6.152565  | 8.221628  |
|                                        | B | 4.941802 | 8.277198  | 8.043510  |
|                                        | H | 4.656489 | 9.046123  | 7.180232  |
|                                        | B | 6.509273 | 7.694457  | 8.671190  |
|                                        | H | 7.652079 | 7.904405  | 8.402582  |
|                                        | B | 6.108066 | 7.401586  | 10.408489 |
|                                        | B | 4.439454 | 6.745333  | 10.378312 |
|                                        | H | 3.887786 | 5.947087  | 11.066400 |
|                                        | B | 3.993534 | 8.229189  | 9.549989  |
|                                        | H | 2.961445 | 8.896918  | 9.999430  |
|                                        | B | 5.639255 | 8.952205  | 9.611503  |
|                                        | B | 4.830221 | 8.305734  | 10.996498 |
|                                        | H | 4.573947 | 8.790745  | 12.046584 |
|                                        | H | 6.021125 | 10.077656 | 9.626257  |
|                                        | H | 2.835548 | 8.720647  | 9.169111  |
| <b>TS<sub>elim</sub>_B<sub>1</sub></b> |   |          |           |           |
| $\Delta G$                             | O | 7.528916 | 6.704845  | 10.417115 |
| -615.14065826                          | O | 5.768923 | 5.451097  | 9.952665  |
| Electronic energy                      | C | 6.866682 | 5.618440  | 10.577967 |
| -613.446674737330                      | C | 7.377939 | 4.590417  | 11.499706 |
| Electronic energy+ZPE                  | H | 6.784669 | 3.684462  | 11.434837 |

|                                        |   |          |           |           |
|----------------------------------------|---|----------|-----------|-----------|
| -613.218437647330                      | H | 7.332497 | 4.993136  | 12.512960 |
|                                        | H | 8.422227 | 4.388249  | 11.266329 |
|                                        | B | 5.071037 | 6.670291  | 7.435101  |
|                                        | H | 4.663688 | 5.840551  | 6.688991  |
|                                        | B | 5.475648 | 6.624950  | 9.053536  |
|                                        | B | 4.224436 | 7.783848  | 8.406427  |
|                                        | H | 3.032232 | 7.805363  | 8.410194  |
|                                        | B | 5.472176 | 8.306280  | 7.173708  |
|                                        | H | 5.340863 | 8.761048  | 6.077912  |
|                                        | B | 6.664550 | 7.110998  | 7.802485  |
|                                        | H | 7.598796 | 6.520355  | 7.351471  |
|                                        | B | 6.795418 | 7.635617  | 9.512290  |
|                                        | B | 5.099398 | 8.154586  | 9.954347  |
|                                        | H | 4.520780 | 8.051164  | 10.991296 |
|                                        | B | 5.127740 | 9.343745  | 8.601152  |
|                                        | H | 4.557502 | 10.380184 | 8.469157  |
|                                        | B | 6.885687 | 8.873550  | 8.182181  |
|                                        | H | 7.781417 | 9.475725  | 7.677543  |
|                                        | B | 6.364058 | 9.227131  | 9.742762  |
|                                        | H | 7.842772 | 9.970054  | 10.240656 |
|                                        | H | 7.640667 | 9.589184  | 10.874832 |
|                                        | C | 5.136842 | 11.657295 | 11.608563 |
|                                        | N | 5.738605 | 10.919584 | 10.972706 |
|                                        | C | 4.36978  | 12.587304 | 12.409183 |
|                                        | H | 4.317381 | 12.222752 | 13.433695 |
|                                        | H | 3.364525 | 12.670068 | 11.999181 |
|                                        | H | 4.851587 | 13.563498 | 12.394042 |
| <b>TS<sub>elim</sub>_B<sub>3</sub></b> |   |          |           |           |

|                       |   |          |          |           |
|-----------------------|---|----------|----------|-----------|
| $\Delta G$            | O | 6.659471 | 5.282354 | 11.023339 |
| -615.15774023         | O | 5.961648 | 3.974424 | 9.385231  |
| Electronic energy     | C | 6.610450 | 4.125092 | 10.473194 |
| -613.461565219376     | C | 7.293357 | 2.975626 | 11.087553 |
| Electronic energy+ZPE | H | 6.542834 | 2.228256 | 11.347716 |
| -613.234698049376     | H | 7.842023 | 3.281376 | 11.972207 |
|                       | H | 7.964548 | 2.531370 | 10.352981 |
|                       | B | 5.554076 | 5.974312 | 7.376590  |
|                       | H | 5.849869 | 5.514861 | 6.322545  |
|                       | B | 5.414753 | 5.282278 | 8.891185  |
|                       | B | 4.025227 | 6.168141 | 8.119087  |
|                       | H | 3.033932 | 5.837427 | 7.547022  |
|                       | B | 5.178476 | 7.560785 | 7.838076  |
|                       | H | 5.183217 | 8.455595 | 7.051756  |
|                       | B | 6.545909 | 6.643831 | 8.584301  |
|                       | H | 7.733995 | 6.669686 | 8.527018  |
|                       | B | 5.845226 | 6.260534 | 10.262631 |
|                       | B | 4.110950 | 6.006437 | 9.930861  |
|                       | H | 3.351056 | 5.271472 | 10.482264 |
|                       | B | 3.953204 | 7.624974 | 9.210646  |
|                       | H | 3.035819 | 8.376666 | 9.125379  |
|                       | B | 5.698314 | 7.857923 | 9.521528  |
|                       | H | 5.915697 | 9.744328 | 8.935616  |
|                       | B | 4.691053 | 7.388531 | 10.750104 |
|                       | H | 4.422235 | 7.846474 | 11.810050 |
|                       | H | 5.722175 | 9.813722 | 9.663057  |
|                       | C | 8.583385 | 8.767888 | 11.308391 |
|                       | N | 7.661139 | 8.690502 | 10.633015 |

|                             |   |          |          |           |
|-----------------------------|---|----------|----------|-----------|
|                             | C | 9.751233 | 8.863629 | 12.160582 |
|                             | H | 10.62606 | 9.088753 | 11.552983 |
|                             | H | 9.903302 | 7.917629 | 12.67774  |
|                             | H | 9.603367 | 9.656569 | 12.891825 |
| <b>TS<sub>elim_B4</sub></b> |   |          |          |           |
| $\Delta G$                  | O | 8.182478 | 6.415632 | 10.880133 |
| -615.15994785               | O | 7.711011 | 4.669199 | 9.602994  |
| Electronic energy           | C | 8.520291 | 5.289706 | 10.376052 |
| -613.463158395253           | C | 9.839927 | 4.708277 | 10.670325 |
| Electronic energy+ZPE       | H | 9.704119 | 3.698281 | 11.056511 |
| -613.236807125253           | H | 10.37998 | 5.321689 | 11.383564 |
|                             | H | 10.39788 | 4.636185 | 9.735937  |
|                             | B | 5.762144 | 5.910082 | 7.897676  |
|                             | H | 5.885005 | 5.485013 | 6.796637  |
|                             | B | 6.483986 | 5.488089 | 9.342495  |
|                             | B | 4.676411 | 5.500827 | 9.148455  |
|                             | H | 3.820521 | 4.683535 | 9.046998  |
|                             | B | 4.849373 | 7.216913 | 8.485067  |
|                             | H | 4.151339 | 7.872216 | 7.779653  |
|                             | B | 6.639351 | 7.154039 | 8.676939  |
|                             | H | 7.548555 | 7.692050 | 8.123702  |
|                             | B | 6.798743 | 6.797162 | 10.459027 |
|                             | B | 5.44033  | 5.681675 | 10.819915 |
|                             | H | 5.35076  | 4.758313 | 11.559998 |
|                             | B | 4.473859 | 6.943604 | 10.156671 |
|                             | H | 2.577611 | 7.974321 | 10.518490 |
|                             | B | 5.742478 | 8.136725 | 9.880140  |
|                             | B | 5.506825 | 7.310299 | 11.386261 |



|                           |   |          |          |           |
|---------------------------|---|----------|----------|-----------|
|                           | H | 5.372447 | 7.736754 | 12.482953 |
|                           | H | 5.789387 | 9.321610 | 9.840259  |
|                           | H | 2.899989 | 8.491314 | 10.078140 |
|                           | C | 1.537543 | 5.216803 | 11.966316 |
|                           | N | 2.250663 | 5.892448 | 11.375097 |
|                           | C | 0.636771 | 4.36155  | 12.713908 |
|                           | H | 0.597398 | 3.378493 | 12.247615 |
|                           | H | -0.3599  | 4.799767 | 12.719403 |
|                           | H | 0.994437 | 4.263444 | 13.737443 |
| <b>Tris_B<sub>1</sub></b> |   |          |          |           |
| $\Delta G$                | O | 7.288963 | 6.661453 | 11.32483  |
| -614.06980779             | O | 6.559572 | 5.134051 | 9.902519  |
| Electronic energy         | C | 7.331063 | 5.467729 | 10.860539 |
| -612.377989431539         | C | 8.269938 | 4.495609 | 11.447219 |
| Electronic energy+ZPE     | H | 7.996965 | 4.339214 | 12.491496 |
| -612.161834151539         | H | 9.273965 | 4.918128 | 11.423711 |
|                           | H | 8.238892 | 3.555597 | 10.906613 |
|                           | B | 5.548475 | 6.915545 | 7.884472  |
|                           | H | 5.748825 | 6.447037 | 6.810862  |
|                           | B | 5.749543 | 6.312102 | 9.423699  |
|                           | B | 4.139565 | 6.925931 | 8.854087  |
|                           | H | 3.139110 | 6.400547 | 8.471858  |
|                           | B | 5.004534 | 8.459021 | 8.340854  |
|                           | H | 4.748230 | 9.255345 | 7.488737  |
|                           | B | 6.585666 | 7.813148 | 8.892971  |
|                           | H | 7.729509 | 7.988308 | 8.596523  |
|                           | B | 6.239296 | 7.464585 | 10.627293 |
|                           | B | 4.521703 | 6.883973 | 10.614102 |

|                           |   |          |           |           |
|---------------------------|---|----------|-----------|-----------|
|                           | H | 3.993113 | 6.075694  | 11.315393 |
|                           | B | 4.025141 | 8.440451  | 9.858307  |
|                           | H | 2.990924 | 9.031871  | 9.926906  |
|                           | B | 5.760464 | 9.068838  | 9.883378  |
|                           | H | 6.205815 | 10.172866 | 9.946515  |
|                           | B | 4.998602 | 8.379347  | 11.232448 |
|                           | C | 4.568910 | 9.337762  | 13.627627 |
|                           | N | 4.757443 | 8.933183  | 12.579516 |
|                           | C | 4.332028 | 9.836175  | 14.954558 |
|                           | H | 5.285155 | 9.921055  | 15.474724 |
|                           | H | 3.681778 | 9.13809   | 15.48052  |
|                           | H | 3.8537   | 10.812644 | 14.8893   |
| <b>Tris_B<sub>3</sub></b> |   |          |           |           |
| $\Delta G$                | O | 7.403607 | 7.137458  | 10.998226 |
| -614.07071892             | O | 6.696895 | 5.500419  | 9.691687  |
| Electronic energy         | C | 7.520366 | 5.940292  | 10.560750 |
| -612.379217697753         | C | 8.585829 | 5.067334  | 11.082543 |
| Electronic energy+ZPE     | H | 8.179262 | 4.527110  | 11.941009 |
| -612.163072117753         | H | 9.432626 | 5.661840  | 11.413847 |
|                           | H | 8.882216 | 4.344588  | 10.327476 |
|                           | B | 5.305474 | 7.090087  | 7.746843  |
|                           | H | 5.443876 | 6.605957  | 6.670452  |
|                           | B | 5.724201 | 6.571672  | 9.275574  |
|                           | B | 4.010101 | 7.002823  | 8.860903  |
|                           | H | 3.032464 | 6.371428  | 8.599539  |
|                           | B | 4.652237 | 8.582817  | 8.217030  |
|                           | H | 4.240508 | 9.349120  | 7.399648  |
|                           | B | 6.341282 | 8.115708  | 8.618725  |

|                           |   |          |           |           |
|---------------------------|---|----------|-----------|-----------|
|                           | H | 7.423924 | 8.430169  | 8.225340  |
|                           | B | 6.198668 | 7.801235  | 10.412743 |
|                           | B | 4.57178  | 7.067777  | 10.580559 |
|                           | H | 4.195813 | 6.219595  | 11.331823 |
|                           | B | 3.838135 | 8.525793  | 9.848878  |
|                           | B | 5.476898 | 9.272571  | 9.673295  |
|                           | B | 4.941288 | 8.621559  | 11.149269 |
|                           | H | 4.835189 | 9.134541  | 12.215099 |
|                           | C | 6.20692  | 11.802078 | 9.578093  |
|                           | N | 5.899644 | 10.706313 | 9.620970  |
|                           | C | 6.596061 | 13.184054 | 9.517816  |
|                           | H | 7.147868 | 13.437595 | 10.422021 |
|                           | H | 5.697271 | 13.796084 | 9.449550  |
|                           | H | 7.221325 | 13.339846 | 8.639792  |
|                           | H | 2.761867 | 9.023511  | 9.975126  |
| <b>Tris_B<sub>4</sub></b> |   |          |           |           |
| $\Delta G$                | O | 7.488075 | 6.577946  | 11.128956 |
| -614.07266191             | O | 6.534092 | 5.098624  | 9.784611  |
| Electronic energy         | C | 7.417253 | 5.401111  | 10.647566 |
| -612.381505939589         | C | 8.362437 | 4.360069  | 11.117561 |
| Electronic energy+ZPE     | H | 7.873418 | 3.788193  | 11.908063 |
| -612.165223249589         | H | 9.259065 | 4.821856  | 11.519538 |
|                           | H | 8.599797 | 3.681274  | 10.302832 |
|                           | B | 5.383873 | 6.945225  | 7.898707  |
|                           | H | 5.439247 | 6.482181  | 6.808669  |
|                           | B | 5.721681 | 6.320137  | 9.406233  |
|                           | B | 4.099463 | 6.985634  | 9.023938  |
|                           | H | 3.020729 | 6.539996  | 8.781262  |

|                                            |   |           |           |           |
|--------------------------------------------|---|-----------|-----------|-----------|
|                                            | B | 4.971904  | 8.502354  | 8.427681  |
|                                            | H | 4.625686  | 9.340654  | 7.653449  |
|                                            | B | 6.563145  | 7.786868  | 8.802426  |
|                                            | H | 7.675341  | 7.919008  | 8.392414  |
|                                            | B | 6.382344  | 7.442121  | 10.569788 |
|                                            | B | 4.675501  | 6.914699  | 10.753419 |
|                                            | H | 4.162912  | 6.117242  | 11.475885 |
|                                            | B | 4.226061  | 8.471554  | 10.057186 |
|                                            | B | 5.925411  | 9.059191  | 9.908499  |
|                                            | H | 6.398608  | 10.150121 | 9.909363  |
|                                            | B | 5.285681  | 8.397805  | 11.367706 |
|                                            | H | 5.195355  | 8.859876  | 12.456875 |
|                                            | C | 2.008217  | 9.876911  | 10.330070 |
|                                            | N | 2.963386  | 9.266581  | 10.233190 |
|                                            | C | 0.793893  | 10.654031 | 10.447483 |
|                                            | H | 0.884643  | 11.350919 | 11.279137 |
|                                            | H | -0.044955 | 9.982455  | 10.624698 |
|                                            | H | 0.627075  | 11.205263 | 9.523292  |
| <b>B<sub>10</sub>_TS<sub>migr_ap</sub></b> |   |           |           |           |
| $\Delta G$                                 | B | -0.01643  | 1.835419  | 0.004942  |
| -255.25441176                              | B | -0.48912  | 0.767313  | -1.204436 |
| Electronic energy                          | B | 1.189317  | 0.727683  | -0.494505 |
| -254.437216652525                          | B | 0.493234  | 0.756457  | 1.189584  |
| Electronic energy+ZPE                      | B | -1.19987  | 0.696580  | 0.485271  |
| -254.292823612525                          | H | -0.03757  | 3.026174  | 0.018855  |
|                                            | H | -0.9249   | 1.186240  | -2.236752 |
|                                            | H | 2.232648  | 1.129476  | -0.921186 |
|                                            | H | 0.909252  | 1.165982  | 2.233797  |

|                                            |   |           |           |           |
|--------------------------------------------|---|-----------|-----------|-----------|
|                                            | H | -2.24542  | 1.087743  | 0.916690  |
|                                            | B | 0.472038  | -0.743874 | -1.241866 |
|                                            | B | 0.035148  | -1.833228 | -0.033037 |
|                                            | B | -1.18581  | -0.760790 | -0.566408 |
|                                            | B | -0.4567   | -0.768871 | 1.212580  |
|                                            | B | 1.198522  | -0.752051 | 0.530612  |
|                                            | H | 0.931189  | -1.153510 | -2.264650 |
|                                            | H | -2.2244   | -1.183089 | -0.974752 |
|                                            | H | -0.91223  | -1.194654 | 2.229753  |
|                                            | H | 2.241557  | -1.167711 | 0.935653  |
|                                            | H | 0.243704  | -3.028864 | -0.127696 |
|                                            | H | -0.81451  | -2.629144 | 0.313176  |
| <b>B<sub>10</sub>_TS<sub>migr_eq</sub></b> |   |           |           |           |
| $\Delta G$                                 | B | 0.169786  | 1.816468  | -0.009962 |
| -255.25061666                              | B | -0.281408 | 0.717409  | -1.239031 |
| Electronic energy                          | B | 1.379083  | 0.723732  | -0.510328 |
| -254.432966757142                          | B | 0.704755  | 0.755780  | 1.165540  |
| Electronic energy+ZPE                      | B | -1.070970 | 0.729126  | 0.409180  |
| -254.288636937142                          | H | 0.125903  | 3.006721  | -0.002170 |
|                                            | H | -0.713530 | 1.119180  | -2.279237 |
|                                            | H | 2.430408  | 1.119247  | -0.920193 |
|                                            | H | 1.064690  | 1.113738  | 2.245401  |
|                                            | H | -2.113611 | 1.175846  | 0.784607  |
|                                            | B | 0.700800  | -0.770493 | -1.208858 |
|                                            | B | 0.152849  | -1.902689 | -0.058288 |
|                                            | B | -1.008858 | -0.795727 | -0.603588 |
|                                            | B | -0.360462 | -0.795404 | 1.097213  |
|                                            | B | 1.347165  | -0.769364 | 0.489201  |

|                                        |   |           |           |           |
|----------------------------------------|---|-----------|-----------|-----------|
|                                        | H | 1.173834  | -1.224905 | -2.208082 |
|                                        | H | -2.045611 | -1.187193 | -1.049738 |
|                                        | H | -0.777222 | -1.438833 | 2.037108  |
|                                        | H | 2.342350  | -1.201646 | 0.988634  |
|                                        | H | 0.161191  | -3.088714 | -0.011350 |
|                                        | H | -1.058556 | -0.130118 | 1.866234  |
| <b>B<sub>10</sub>_H<sub>2</sub>_ap</b> |   |           |           |           |
| $\Delta G$                             | B | 0.006498  | 1.849499  | -0.00433  |
| -255.25732679                          | B | -0.502339 | 0.769611  | -1.19842  |
| Electronic energy                      | B | 1.183257  | 0.723405  | -0.49245  |
| -254.442841042443                      | B | 0.479123  | 0.758464  | 1.194559  |
| Electronic energy+ZPE                  | B | -1.207021 | 0.76592   | 0.488832  |
| -254.294815752443                      | H | 0.026203  | 3.041333  | -0.00696  |
|                                        | H | -0.922767 | 1.18478   | -2.24011  |
|                                        | H | 2.232593  | 1.110347  | -0.92143  |
|                                        | H | 0.913178  | 1.163822  | 2.234537  |
|                                        | H | -2.242892 | 1.189053  | 0.91626   |
|                                        | B | 0.452546  | -0.7543   | -1.21437  |
|                                        | B | -0.054665 | -1.77619  | 0.003227  |
|                                        | B | -1.238750 | -0.72488  | -0.52069  |
|                                        | B | -0.526307 | -0.73235  | 1.21672   |
|                                        | B | 1.164436  | -0.76318  | 0.523537  |
|                                        | H | 0.886308  | -1.18624  | -2.24071  |
|                                        | H | -2.280585 | -1.13136  | -0.9421   |
|                                        | H | -0.974637 | -1.14591  | 2.244416  |
|                                        | H | 2.191366  | -1.20279  | 0.948233  |
|                                        | H | 0.331901  | -2.99464  | -0.15302  |
|                                        | H | -0.477816 | -2.98112  | 0.169874  |

|                                            |   |           |           |           |
|--------------------------------------------|---|-----------|-----------|-----------|
| <b>B<sub>10</sub>_H<sub>2</sub>_eq</b>     |   |           |           |           |
| $\Delta G$                                 | B | 0.089384  | 1.815822  | -0.33539  |
| -255.26175990                              | B | -0.343618 | 0.742494  | -1.57959  |
| Electronic energy                          | B | 1.309173  | 0.731729  | -0.8088   |
| -254.447069435971                          | B | 0.562875  | 0.704296  | 0.846037  |
| Electronic energy+ZPE                      | B | -1.131956 | 0.715179  | 0.056116  |
| -254.298544945971                          | H | 0.079264  | 3.007132  | -0.29951  |
|                                            | H | -0.734036 | 1.163142  | -2.63021  |
|                                            | H | 2.369165  | 1.142701  | -1.18399  |
|                                            | H | 0.930972  | 1.052517  | 1.92912   |
|                                            | H | -2.194029 | 1.074158  | 0.472204  |
|                                            | B | 0.646676  | -0.764999 | -1.56462  |
|                                            | B | 0.108409  | -1.906631 | -0.42873  |
|                                            | B | -1.069926 | -0.782414 | -0.97122  |
|                                            | B | -0.406286 | -0.779907 | 0.68773   |
|                                            | B | 1.292464  | -0.797132 | 0.13279   |
|                                            | H | 1.122338  | -1.169558 | -2.58537  |
|                                            | H | -2.098973 | -1.187712 | -1.42179  |
|                                            | H | -0.811804 | -1.656620 | 1.557343  |
|                                            | H | 2.292464  | -1.216427 | 0.633155  |
|                                            | H | 0.099316  | -3.095458 | -0.4243   |
|                                            | H | -0.966248 | -0.861047 | 1.86869   |
| <b>B<sub>10</sub>_TS<sub>elim</sub>_ap</b> |   |           |           |           |
| $\Delta G$                                 | B | -0.499951 | 2.017721  | 0.248538  |
| -387.95234186                              | B | -0.975891 | 0.969136  | -0.989322 |
| Electronic energy                          | B | 0.704032  | 0.940204  | -0.243303 |
| -386.802169127510                          | B | -0.040801 | 0.905170  | 1.436509  |
| Electronic energy+ZPE                      | B | -1.720889 | 0.938369  | 0.690369  |

|                                            |   |           |           |           |
|--------------------------------------------|---|-----------|-----------|-----------|
| -386.614190847510                          | H | -0.490419 | 3.208436  | 0.275660  |
|                                            | H | -1.376428 | 1.411969  | -2.026319 |
|                                            | H | 1.755528  | 1.352901  | -0.637869 |
|                                            | H | 0.363948  | 1.293117  | 2.493704  |
|                                            | H | -2.767996 | 1.344657  | 1.104695  |
|                                            | B | 0.021539  | -0.535634 | -1.029969 |
|                                            | B | -0.531242 | -1.498402 | 0.166782  |
|                                            | B | -1.741048 | -0.533689 | -0.354658 |
|                                            | B | -1.059431 | -0.581711 | 1.409442  |
|                                            | B | 0.698370  | -0.581346 | 0.730084  |
|                                            | H | 0.470940  | -0.952344 | -2.053531 |
|                                            | H | -2.761656 | -0.947079 | -0.815195 |
|                                            | H | -1.512801 | -1.031529 | 2.417892  |
|                                            | H | 1.708592  | -1.037807 | 1.170961  |
|                                            | H | 0.962913  | -3.349159 | -0.336590 |
|                                            | H | 0.353005  | -3.771196 | -0.231043 |
|                                            | C | -2.885568 | -3.452033 | 0.981875  |
|                                            | N | -1.965435 | -3.937036 | 0.495565  |
|                                            | C | -4.026801 | -2.799944 | 1.589246  |
|                                            | H | -4.145072 | -3.144865 | 2.614877  |
|                                            | H | -4.926894 | -3.023762 | 1.019270  |
|                                            | H | -3.857953 | -1.723158 | 1.587630  |
| <b>B<sub>10</sub>_TS<sub>elim_eq</sub></b> |   |           |           |           |
| $\Delta G$                                 | B | 5.909372  | 6.059835  | 7.530827  |
| -387.97361420                              | H | 6.314172  | 5.612215  | 6.504263  |
| Electronic energy                          | B | 5.824369  | 5.342796  | 9.069167  |
| -386.823236004072                          | B | 4.348092  | 6.007537  | 8.197003  |
| Electronic energy+ZPE                      | H | 3.464167  | 5.479967  | 7.588053  |



|                                                                    |   |           |           |           |
|--------------------------------------------------------------------|---|-----------|-----------|-----------|
| -386.635098724072                                                  | B | 5.231775  | 7.570446  | 7.883762  |
|                                                                    | H | 5.096011  | 8.454377  | 7.094032  |
|                                                                    | B | 6.714799  | 6.904852  | 8.758643  |
|                                                                    | H | 7.869010  | 7.208486  | 8.728654  |
|                                                                    | B | 6.029278  | 6.485910  | 10.446312 |
|                                                                    | B | 4.369562  | 5.910515  | 10.022236 |
|                                                                    | H | 3.676947  | 5.116080  | 10.586359 |
|                                                                    | B | 3.907268  | 7.448470  | 9.190813  |
|                                                                    | H | 2.875822  | 8.007805  | 8.997343  |
|                                                                    | B | 5.544344  | 7.893304  | 9.557007  |
|                                                                    | H | 5.352447  | 10.469136 | 8.763558  |
|                                                                    | B | 4.604306  | 7.419763  | 10.782626 |
|                                                                    | H | 4.204736  | 7.866704  | 11.806689 |
|                                                                    | H | 5.760327  | 10.552233 | 9.384496  |
|                                                                    | C | 8.318592  | 9.047040  | 11.321308 |
|                                                                    | N | 7.487388  | 9.798085  | 11.071116 |
|                                                                    | C | 9.360895  | 8.089091  | 11.635906 |
|                                                                    | H | 9.532677  | 7.443072  | 10.776277 |
|                                                                    | H | 9.055334  | 7.482244  | 12.486633 |
|                                                                    | H | 10.280936 | 8.617412  | 11.881550 |
|                                                                    | H | 6.798668  | 6.231168  | 11.317056 |
|                                                                    | H | 6.236804  | 4.230953  | 9.225541  |
| <b>[1-B<sub>10</sub>H<sub>9</sub>NCCH<sub>3</sub>]<sup>-</sup></b> |   |           |           |           |
| $\Delta G$                                                         | B | -0.029688 | 1.572347  | 0.020214  |
| -386.87263146                                                      | B | -0.493994 | 0.511393  | -1.21547  |
| Electronic energy                                                  | B | 1.183056  | 0.507722  | -0.49389  |
| -385.728507273240                                                  | B | 0.461677  | 0.442203  | 1.182178  |
| Electronic energy+ZPE                                              | B | -1.215190 | 0.445434  | 0.460319  |

|                                                                    |   |           |          |           |
|--------------------------------------------------------------------|---|-----------|----------|-----------|
| -385.549298683240                                                  | H | -0.044282 | 2.765031 | 0.059101  |
|                                                                    | H | -0.917753 | 0.944434 | -2.25056  |
|                                                                    | H | 2.227058  | 0.937679 | -0.89862  |
|                                                                    | H | 0.875074  | 0.814052 | 2.244922  |
|                                                                    | H | -2.269966 | 0.819768 | 0.89182   |
|                                                                    | B | 0.517039  | -0.97783 | -1.26037  |
|                                                                    | B | 0.017038  | -2.0846  | -0.10335  |
|                                                                    | B | -1.189947 | -1.0222  | -0.5819   |
|                                                                    | B | -0.510922 | -1.07154 | 1.124891  |
|                                                                    | B | 1.196819  | -1.02722 | 0.446686  |
|                                                                    | H | 0.965531  | -1.36557 | -2.30167  |
|                                                                    | H | -2.211662 | -1.4498  | -1.03917  |
|                                                                    | H | -0.949722 | -1.54051 | 2.136488  |
|                                                                    | H | 2.229741  | -1.45664 | 0.876039  |
|                                                                    | C | 0.026978  | -4.70252 | -0.20617  |
|                                                                    | N | 0.027959  | -3.56412 | -0.15772  |
|                                                                    | C | 0.005766  | -6.14044 | -0.26699  |
|                                                                    | H | -0.512825 | -6.44811 | -1.17408  |
|                                                                    | H | -0.518984 | -6.52401 | 0.60703   |
|                                                                    | H | 1.028100  | -6.51569 | -0.27935  |
| <b>[2-B<sub>10</sub>H<sub>9</sub>NCCH<sub>3</sub>]<sup>-</sup></b> |   |           |          |           |
| $\Delta G$                                                         | B | -0.224136 | 1.815875 | -0.462928 |
| -386.87301506                                                      | B | -0.113241 | 0.613043 | -1.662453 |
| Electronic energy                                                  | B | 1.209363  | 0.927662 | -0.450768 |
| -385.729271167470                                                  | B | 0.008869  | 0.845963 | 0.916121  |
| Electronic energy+ZPE                                              | B | -1.278983 | 0.515260 | -0.295784 |
| -385.549833157470                                                  | H | 2.259062  | 1.497368 | -0.550604 |
|                                                                    | H | -0.027806 | 1.339702 | 2.006147  |

|  |   |           |           |           |
|--|---|-----------|-----------|-----------|
|  | B | 1.031848  | -0.702639 | -1.212458 |
|  | B | 0.357115  | -1.847756 | -0.160323 |
|  | B | -0.754077 | -0.992818 | -1.105634 |
|  | B | -0.667957 | -0.828064 | 0.717170  |
|  | B | 1.118056  | -0.539613 | 0.602671  |
|  | H | -1.544516 | -1.548617 | -1.814965 |
|  | H | -1.382813 | -1.242679 | 1.585390  |
|  | H | 2.005173  | -0.734926 | 1.384918  |
|  | H | 0.546022  | -3.022191 | -0.065182 |
|  | H | 1.843198  | -1.041936 | -2.027214 |
|  | H | -0.258160 | 0.901847  | -2.815313 |
|  | H | -0.458784 | 2.980962  | -0.555896 |
|  | C | -3.880937 | 0.967667  | -0.241810 |
|  | N | -2.757944 | 0.779146  | -0.257480 |
|  | C | -5.301328 | 1.200381  | -0.227944 |
|  | H | -5.642560 | 1.242034  | 0.805652  |
|  | H | -5.798449 | 0.382760  | -0.748176 |
|  | H | -5.514388 | 2.144674  | -0.726591 |

**Table S3.** Cartesian atomic coordinates of the calculated optimized equilibrium model structures. All calculations were performed in dichloromethane CH<sub>2</sub>Cl<sub>2</sub> phase. Solvent molecules were not taken into account explicitly. Solvent effects were considered using the Solvation Model based on Density (SMD). Atomic coordinates are given in Angstrom units. Gibbs energy (wB97X-D3 level of theory; kJ/mol), electronic energy (DLPNO-CCSDT level of theory; kJ/mol), electronic energy + ZPE corrections (DLPNO-CCSDT level of theory; kJ/mol). All coordinates are given in Angstrom units, Å.
